# Supplementary material for: Integrative proteomics and lipidomics reveals dual roles for lipid droplets in the host cell antiviral response
Source: Research Square preprint supplement (doi:10.21203/rs.3.rs-7006641/v1), 2025-07-10
Supplement: Supplementary file 1 [file 98a4541170c7d8e8a6119f20.docx]

Supplementary Materials for

Integrative proteomics and lipidomics reveals dual roles for lipid droplets in the host cell antiviral response

EA Monson†*, Z Telikani†, JL Laws†, AJ Milligan, AM Rozario, I Amarasinghe, ML Smith, SE Bamford, V Tran, QN Dinh, N Williamson, A Mechler, PJ Pigram, JK Holien, CJ Johnson, S Nie, MJ Hofer, DR Whelan and KJ Helbig*

Correspondence: [k.helbig@latrobe.edu.au](mailto:k.helbig@latrobe.edu.au) and [e.monson@latrobe.edu.au](mailto:e.monson@latrobe.edu.au)

**The PDF file includes:**

Fig S1 to S7

Table legends S1 to S4

**Other Supplementary Materials for this manuscript include the following:**

Movies S1 to S4

**
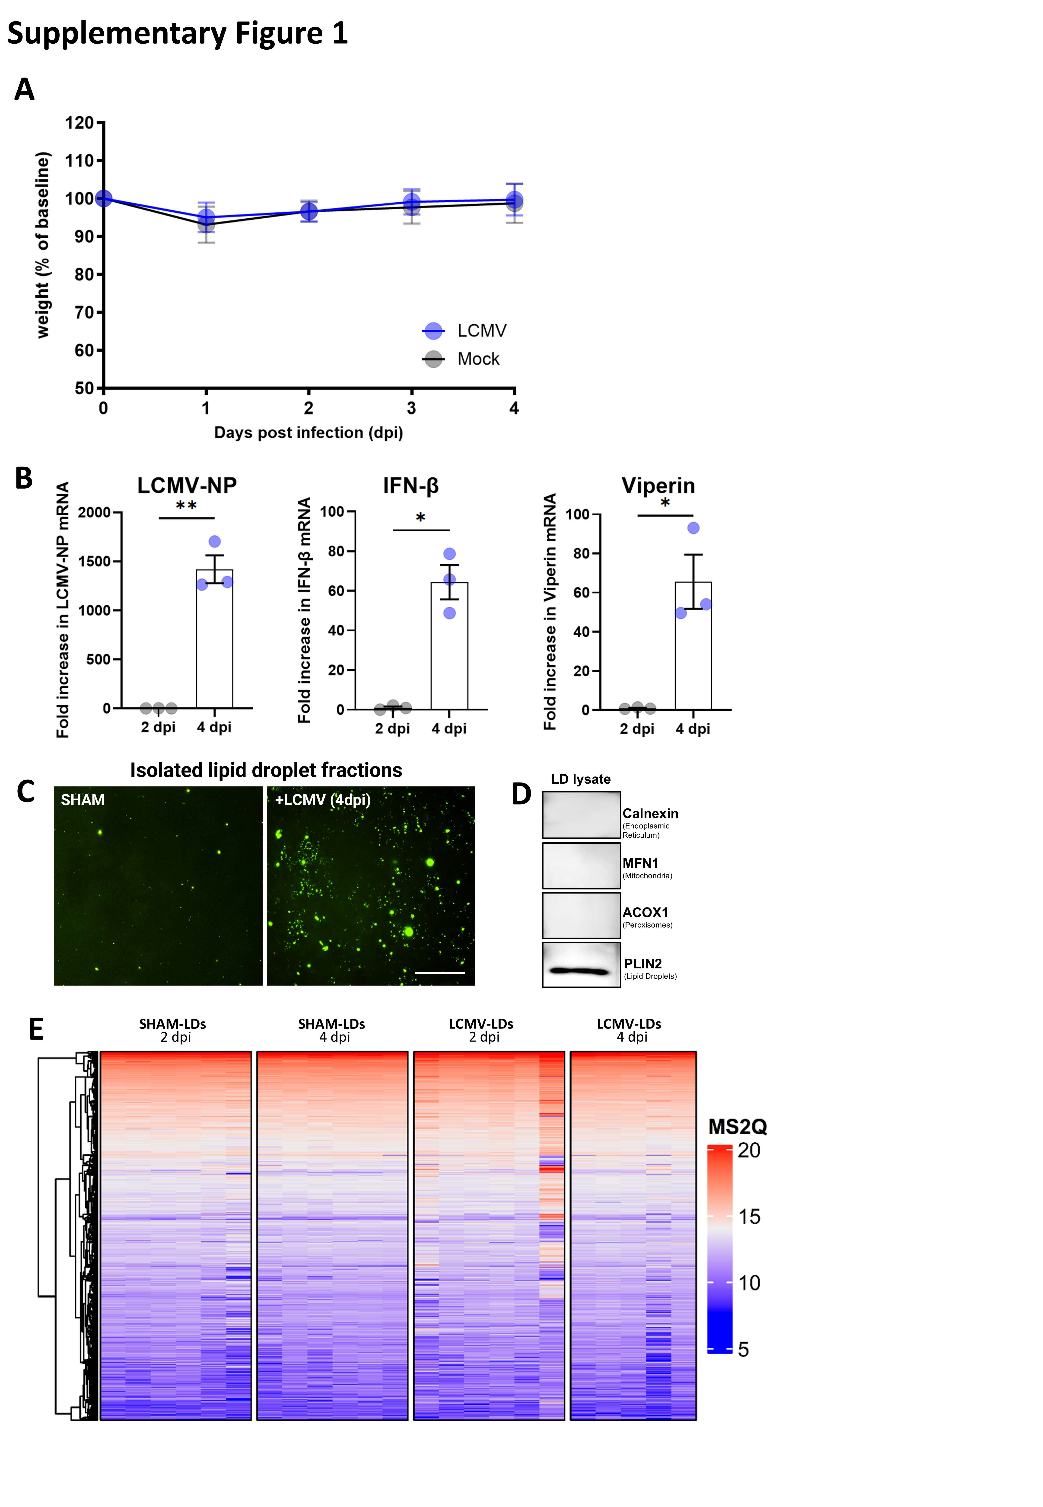
**

**Figure S1: LCMV infection of the brain drives a proteomic shift on lipid droplets in mice.** (**A**) Intracranially injected SHAM or LCMV mice were monitored for periods of 2- and 4-dpi and changes in body (%) were compared to day 0 (day of injection). (**B**) RT-qPCR analysis was used to quantify viral infection (LCMV-NP expression) and subsequent antiviral responses (IFN-β and viperin expression) in the brain tissues obtained post LCMV infection at 2 dpi and 4 dpi, data is expressed as the change in induction at 2 dpi relative to 4dpi. Error bars, mean values ± SEM, P values determined by Student *t* test (n= 3 mice per group) *p<0.05, **p<0.01. **(C)** Representative images of LDs (Bodipy (493/503), green) following their isolation from brain tissues. Images were taken on Nikon T*i*E fluorescence microscope. Scale bar represents 50 µm. **(D)** Isolated LDs were probed for contamination organelle markers: endoplasmic reticulum (Calnexin), mitochondria (MFN1), peroxisomes (ACOX1) and a positive control for LDs (PLIN2) via western blotting. **(E)** Heatmap displaying protein intensities of all identified proteins on LDs isolated from mice brain tissues from SHAM or LCMV infection at 2 dpi and 4 dpi. High abundance is shown in red, and low abundance is shown in blue.

**
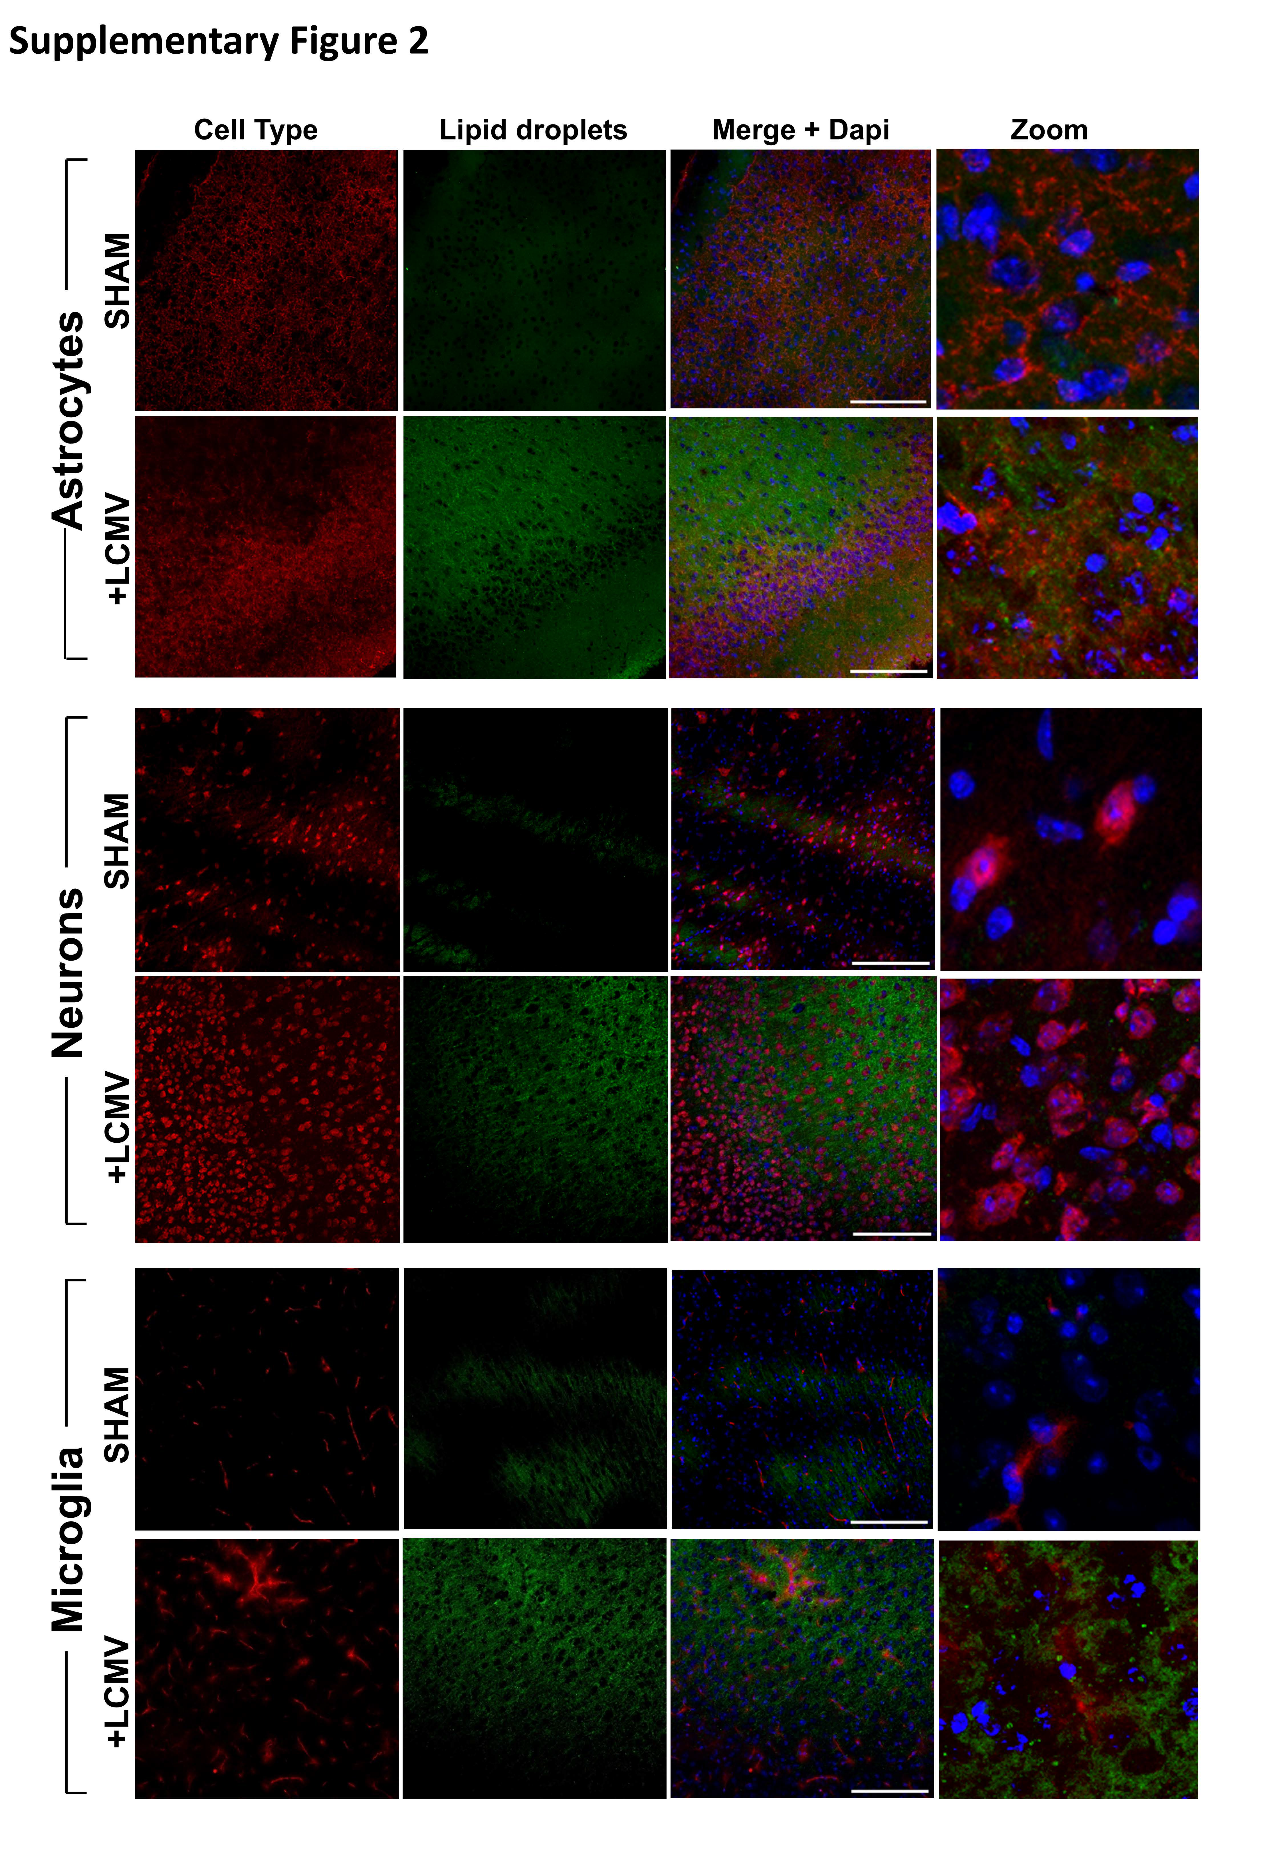
**

**Figure S2: Lipid droplets are significantly upregulated in astrocyte cells in LCMV infected brains.** Brain tissues were sectioned and stained for the major cell types; Astrocytes (αGFAP), Neurons (αNeuN) and Microglia (αTMEM119). All cell types are shown in red; LDs stained with Bodipy (493/503) (green) and DAPI to visualise the cell nuclei (blue). Tissues were imaged on a Zeiss 800 confocal microscope. Original magnification is 10X. Scale bar represents 300 µm squares represent inserts of zoom images. Images representative of n=6.

**
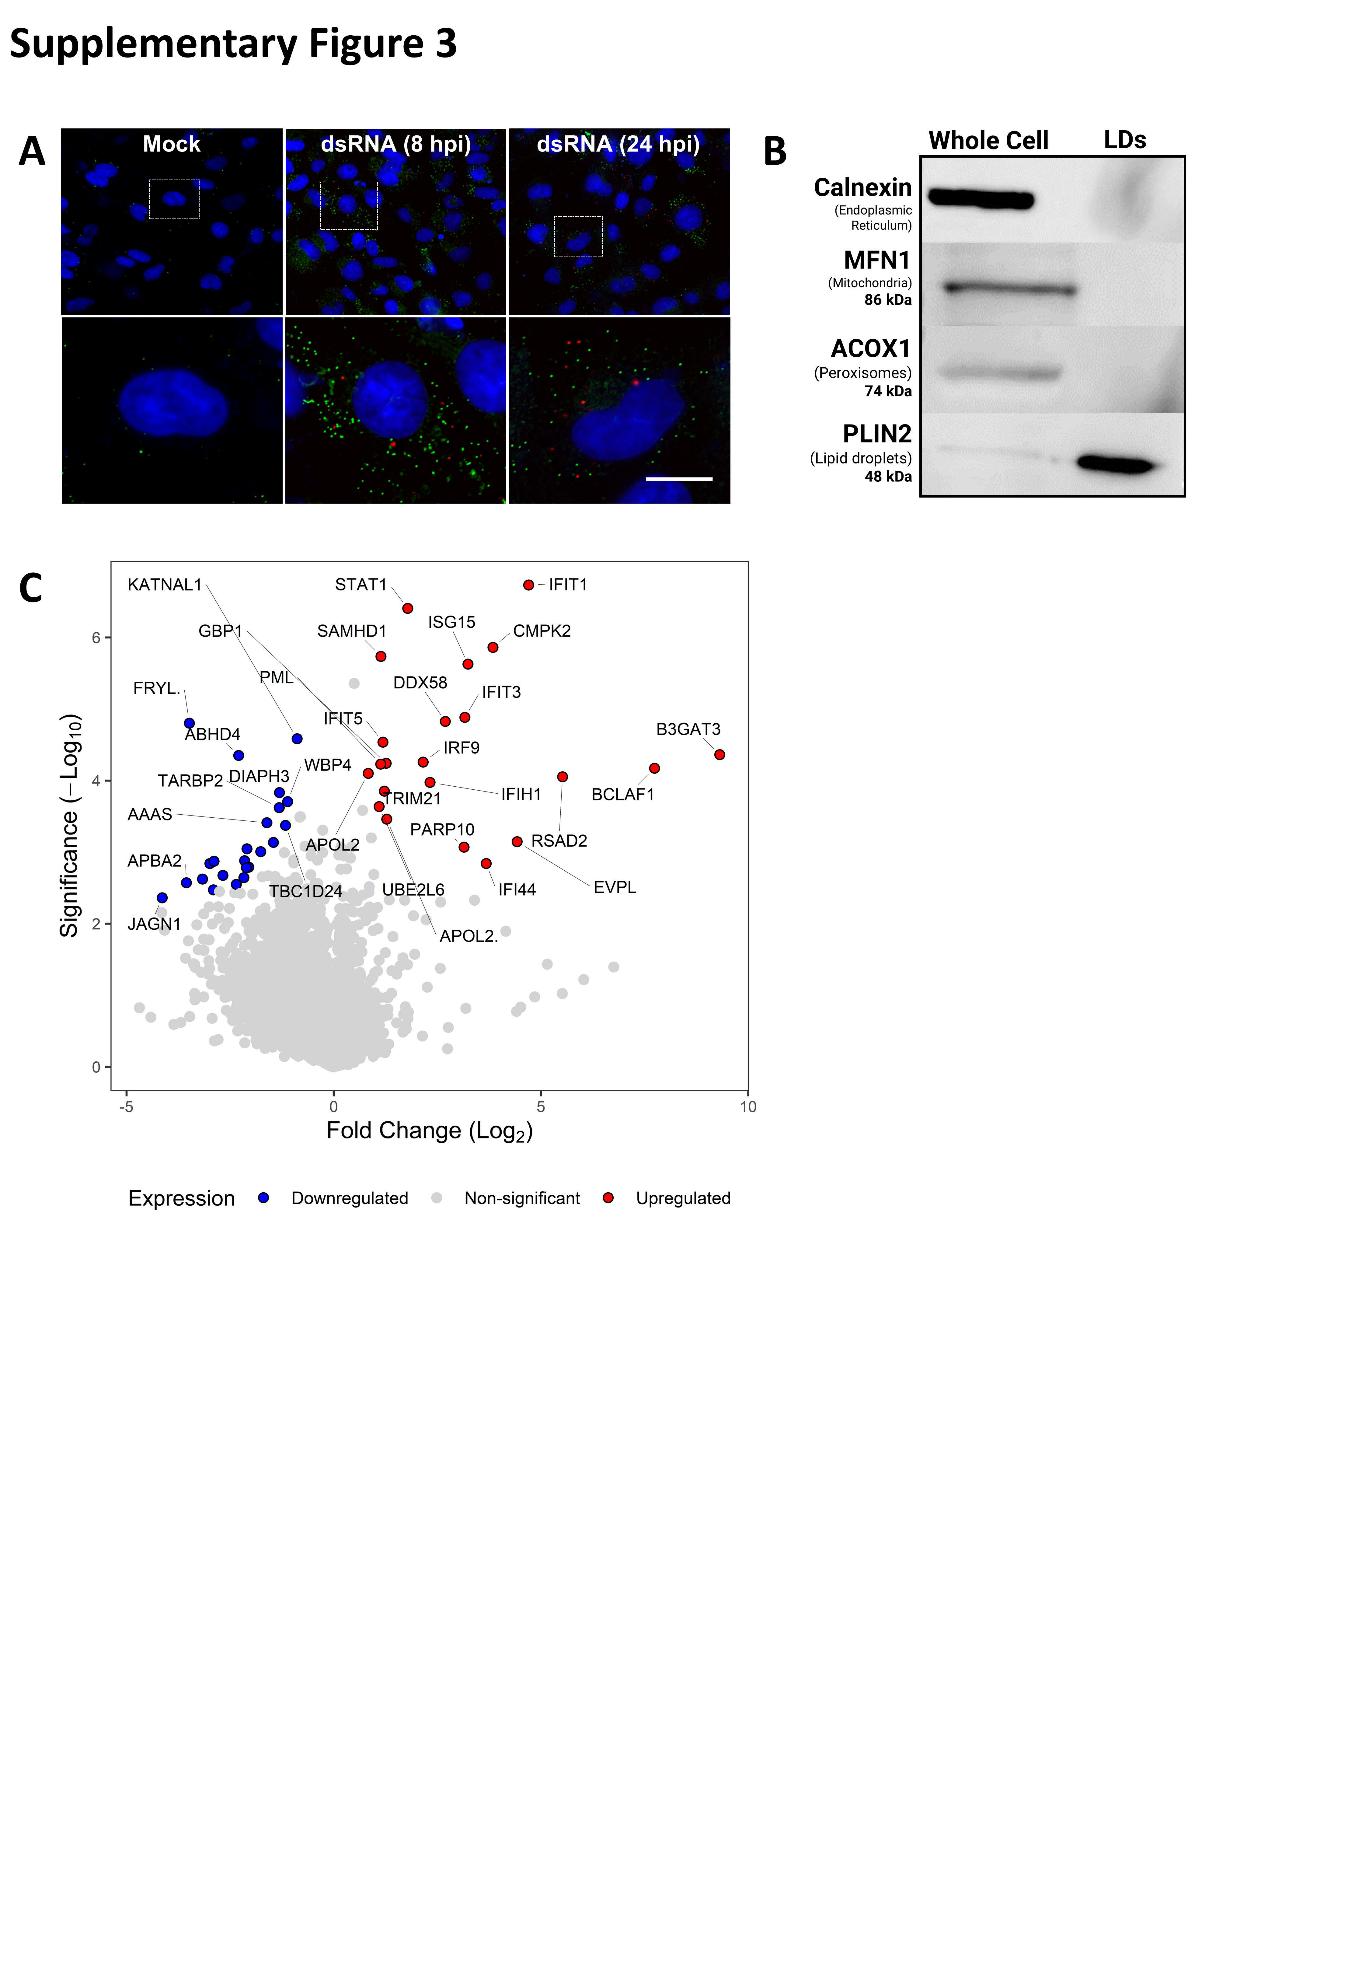
**

**Figure S3: The lipid droplet proteome significantly changes in astrocyte cells following dsRNA stimulation.** (**A)** Primary immortalised human astrocyte cells were stimulated with dsRNA tagged with Rhodamine (red) for 8 and 24 hrs and stained with Bodipy (493/503) to visualise LDs (green) and DAPI to visualise the cell nuclei (blue). Cells were imaged on a Zeiss 800 confocal microscope. Original magnification is 63X. Scale bar, 50 μm. (**B**) The purity of LDs isolated from primary immortalised astrocyte cells was assessed by immunoblot analysis. Equal amounts of protein from LD fractions and whole cell lysates were separated by SDS and blotted with indicated antibodies: perilipin 2 (PLIN2) for LDs, MFN1 for mitochondria, Calnexin for ER and ACOX1 for peroxisome contaminants. Image is representative of n=3. (**C**) Volcano plot for differentially expressed genes when comparing dsRNA stimulated LDs for 8 hpi with their respective controls. (n= 3 replicates per condition).

**
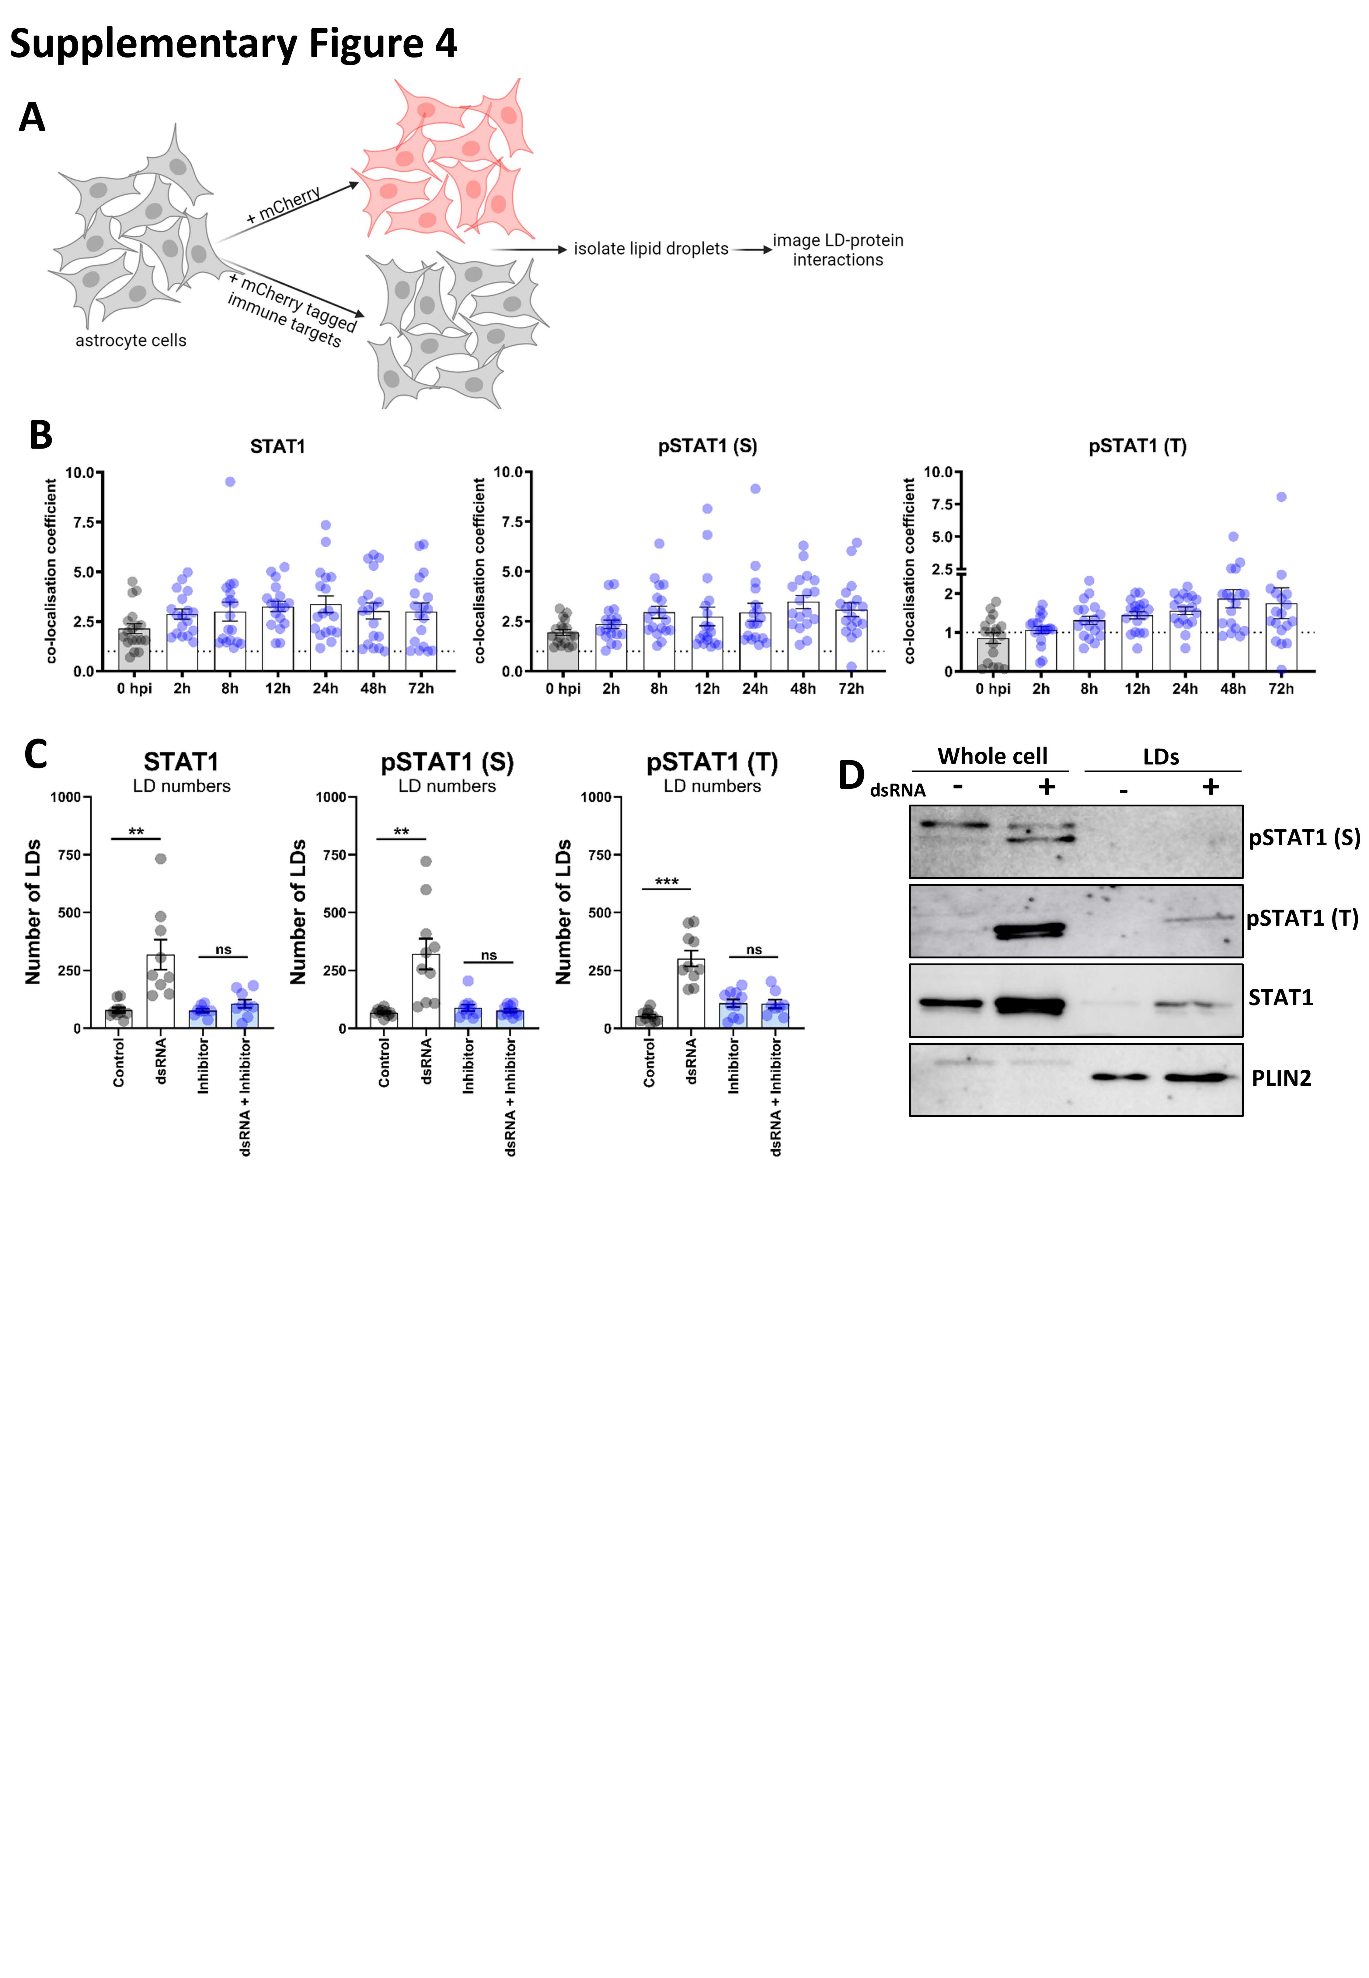
**

**Figure S4: Lipid droplets house STAT proteins following innate immune activation of the cell by dsRNA.** (**A)** Schematic diagram of experiments outlined in Fig 3C. Primary immortalised astrocyte cells were transfected with mCherry labelled proteins (viperin, STAT1 and STAT2) or mCherry control plasmid and their LDs were isolated. Isolated LD fractions were stained with Bodipy (493/503) to visualise isolated LD and were imaged on a Zeiss 780 confocal. (**B**) Quantification of the degree of randomness of STAT1 (STAT1, phSTAT1 (S; Serine 727, T; Tyrosine 701) co-localisation events per LD in primary immortalised astrocytes following dsRNA stimulation at 2, 8. 12. 24. 48 and 72 hpi. Images were analysed using the Object Co-localisation plugin in ImageJ. **(C)** Quantification of LDs number from Fig S4 B. n= 18 cells over 3 biological replicates, error bars represent ± SEM. **(D)** Isolated LD fractions before and following dsRNA stimulation (24 hpi) were probed via immunoblot for the different activation states of STAT1 (STAT1 in all forms, ph-STAT1 (S; serine 727) and (T; tyrosine 701).

**
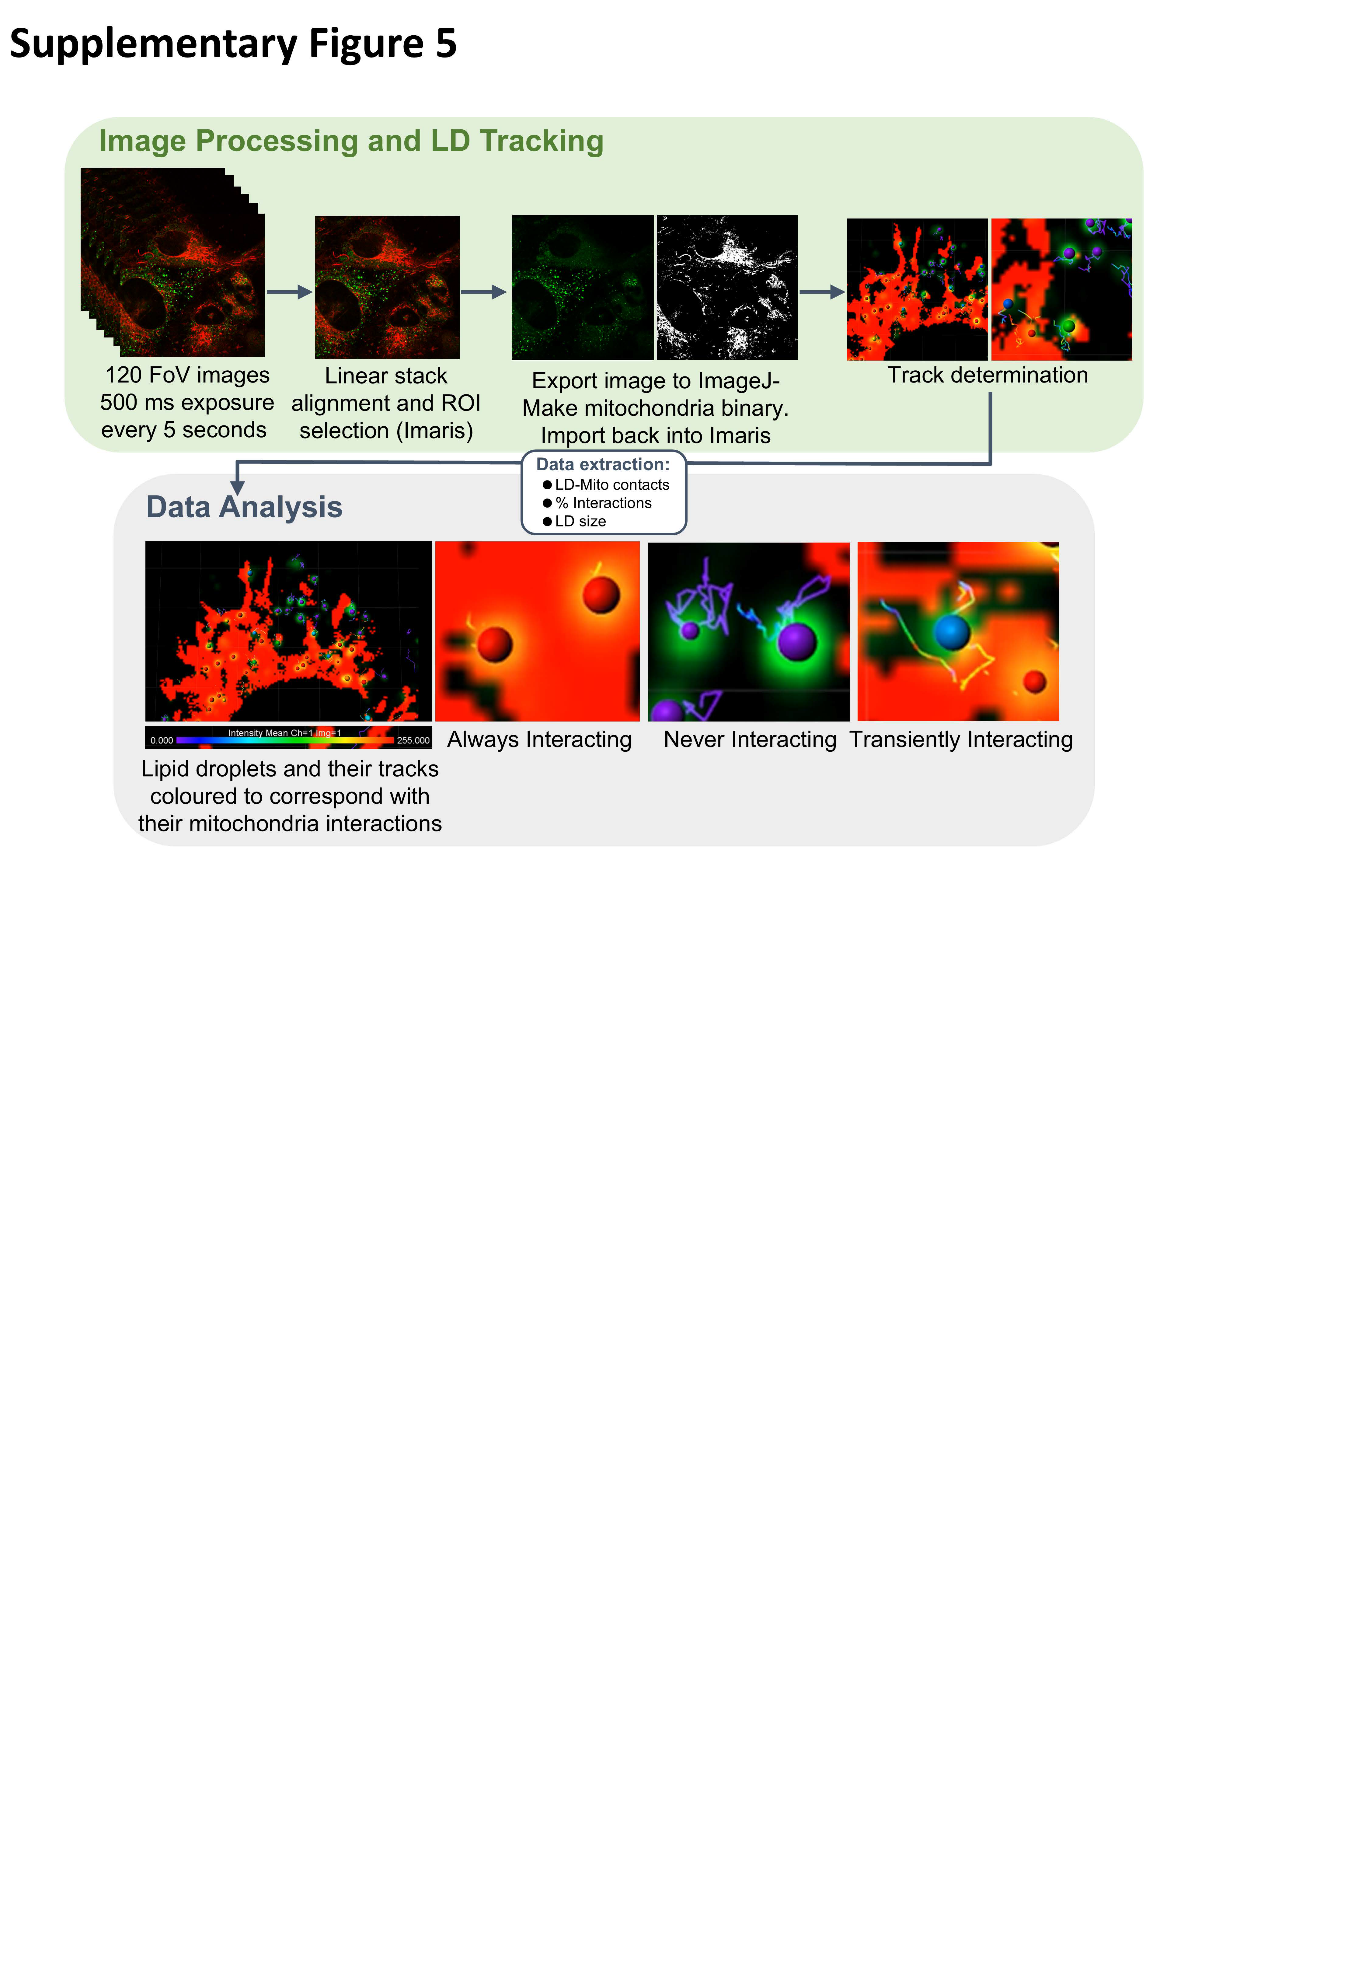
**

**Figure S5: Lipid droplet-mitochondria interaction pipeline.** Primary immortalised astrocytes were stained live with Bodipy (493/503) to visualise LDs, and MitoTracker Red to stain mitochondria prior to live imaging in cells. A total of 120 FoV images were captured at 500 ms exposure rates every 5 s (10 min in total). Image stacks were aligned using linear stack alignment with SIFT plugin. Mitochondria channels were binarised in ImageJ, and the LD/Mito image stack was imported into Imaris image software. LDs were tracked using the “spots” function on Imaris and were coloured based on their intensity interactions with the mitochondria (red= interacting, purple= not interacting). Mean intensity (LDs to Mito), LD size and diameter were extracted and imported into Excel. Data was cleaned up by the exclusion of any data with large cell morphology shifts, >1 µm gaps/missing frames in LD paths and tracks which were < 10 frames. Interactions were analysed based on intensity (intensities over 100 were counted as interacting; with interactions lasting the duration of the movie counted as “always” interacting, intensities below 100 for the duration of the movie were counted as “never” interacting and those that had intensities over 100 at multiple stages of the movie were counted as “transient” interactions. n= 100 cells across 6 fields of view over 3 biological replicates.


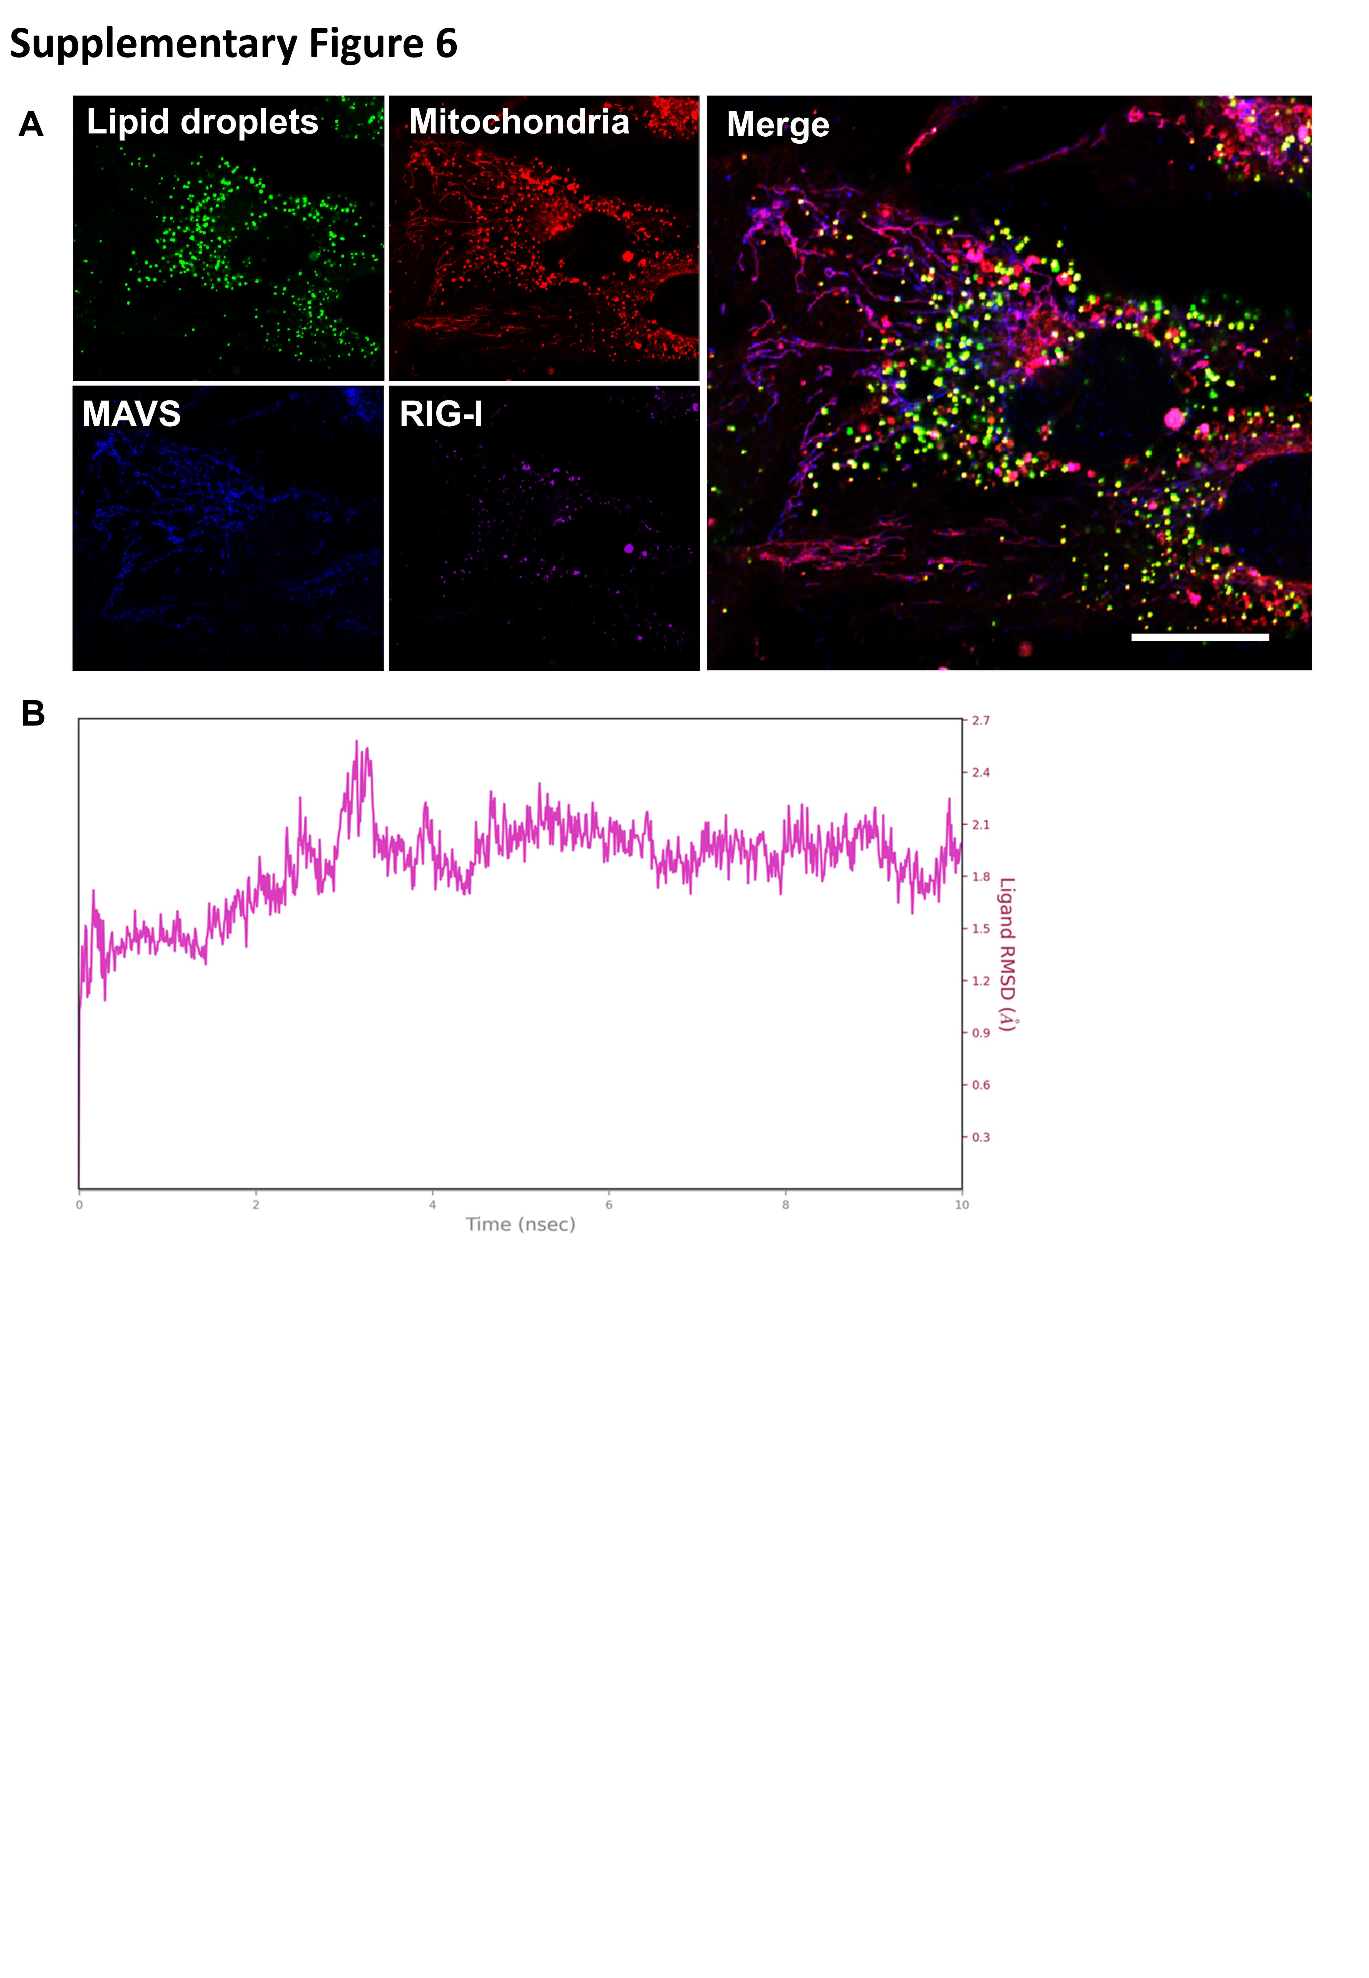


**Figure S6: Virally driven lipid droplets localise important antiviral proteins to their surface during infection.** (**A)** Separated channels of Fig 5H.Primary immortalised astrocyte cells were transfected with a RIG-I over expression plasmid and stimulated with dsRNA for 24 hpi. Cells were live stained with MitoTracker Red prior to fixation and all cells were stained with Autodot LD dye to visualise LDs (green), αRIG-I antibody (1:200) (purple) and αMAVS antibody (1:100) (blue). Scale bar, 50 μm. **(B)** RMSD of the MD minimisation showed that the interactions remained stable across the 10ns simulation time.


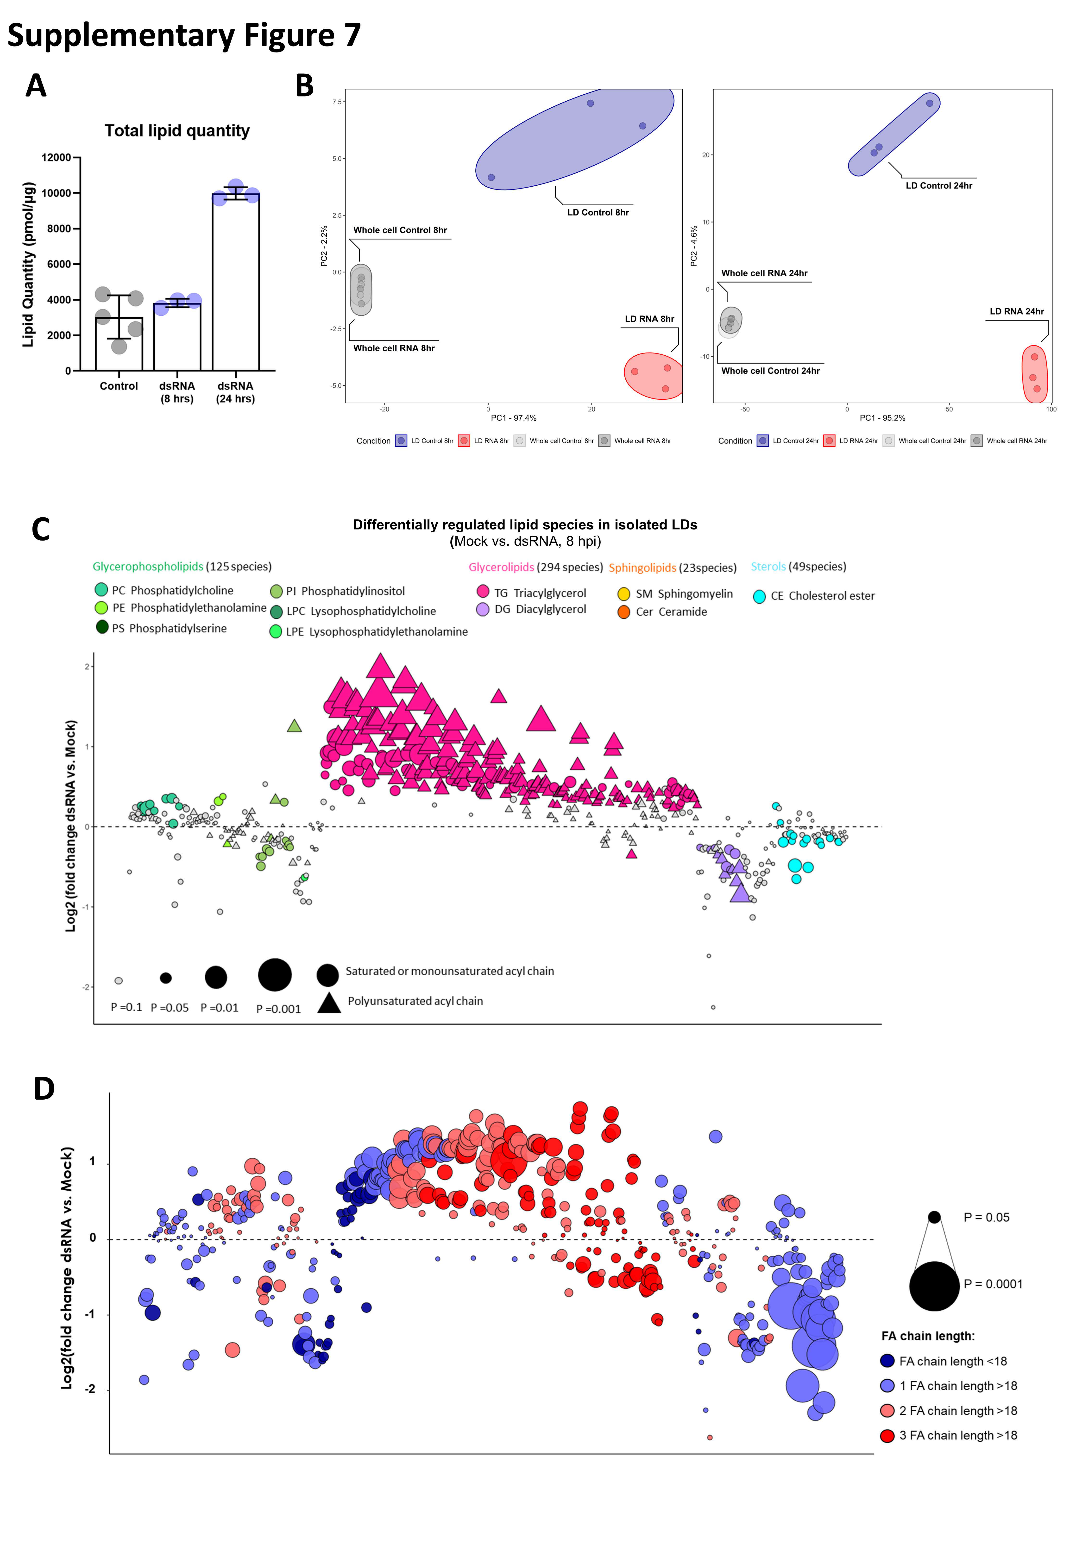


**Figure S7: Changes in lipidome of lipid droplets is initiated early (8 hrs) following dsRNA stimulation in primary immortalised astrocytes.** (**A)** Total lipid content (pmol/µg) quantified in LDs isolated from control and dsRNA-stimulated primary immortalised astrocytes at 8 and 24 hours. (**B**) Principal component analysis (PCA) of lipid species identified in whole cell lysates and LD fractions isolated from primary immortalized astrocytes following dsRNA stimulation at 8 hrs and 24 hrs, respectively (n= 3, biological replicates). (**C**) Bubble plot of log2 fold changes in abundance of individual lipid species in dsRNA stimulated cells relative to mock at 8 hpi. Significance was determined by unpaired two-tailed students *t* test(n= 3). Individual lipid species are coloured by the class of lipid that they belong to. PC phosphatidylcholine; PE phosphatidylethanolamine; PI phosphatidylinositol; PS phosphatidylserine; LPC lysophosphatidylcholine; LPE lysophosphatidylethanolamine; DAG diacylglycerol; TAG triacylglycerol; Cer ceramide; SM sphingomyelin; CE cholesterol ester. **(D)** Bubble plotof log2 fold changes in abundance of side chain fatty acids in isolated LDs following dsRNA stimulation 24 hpi. Fatty acid chain lengths were grouped based on carbon number of side chain fatty acids.


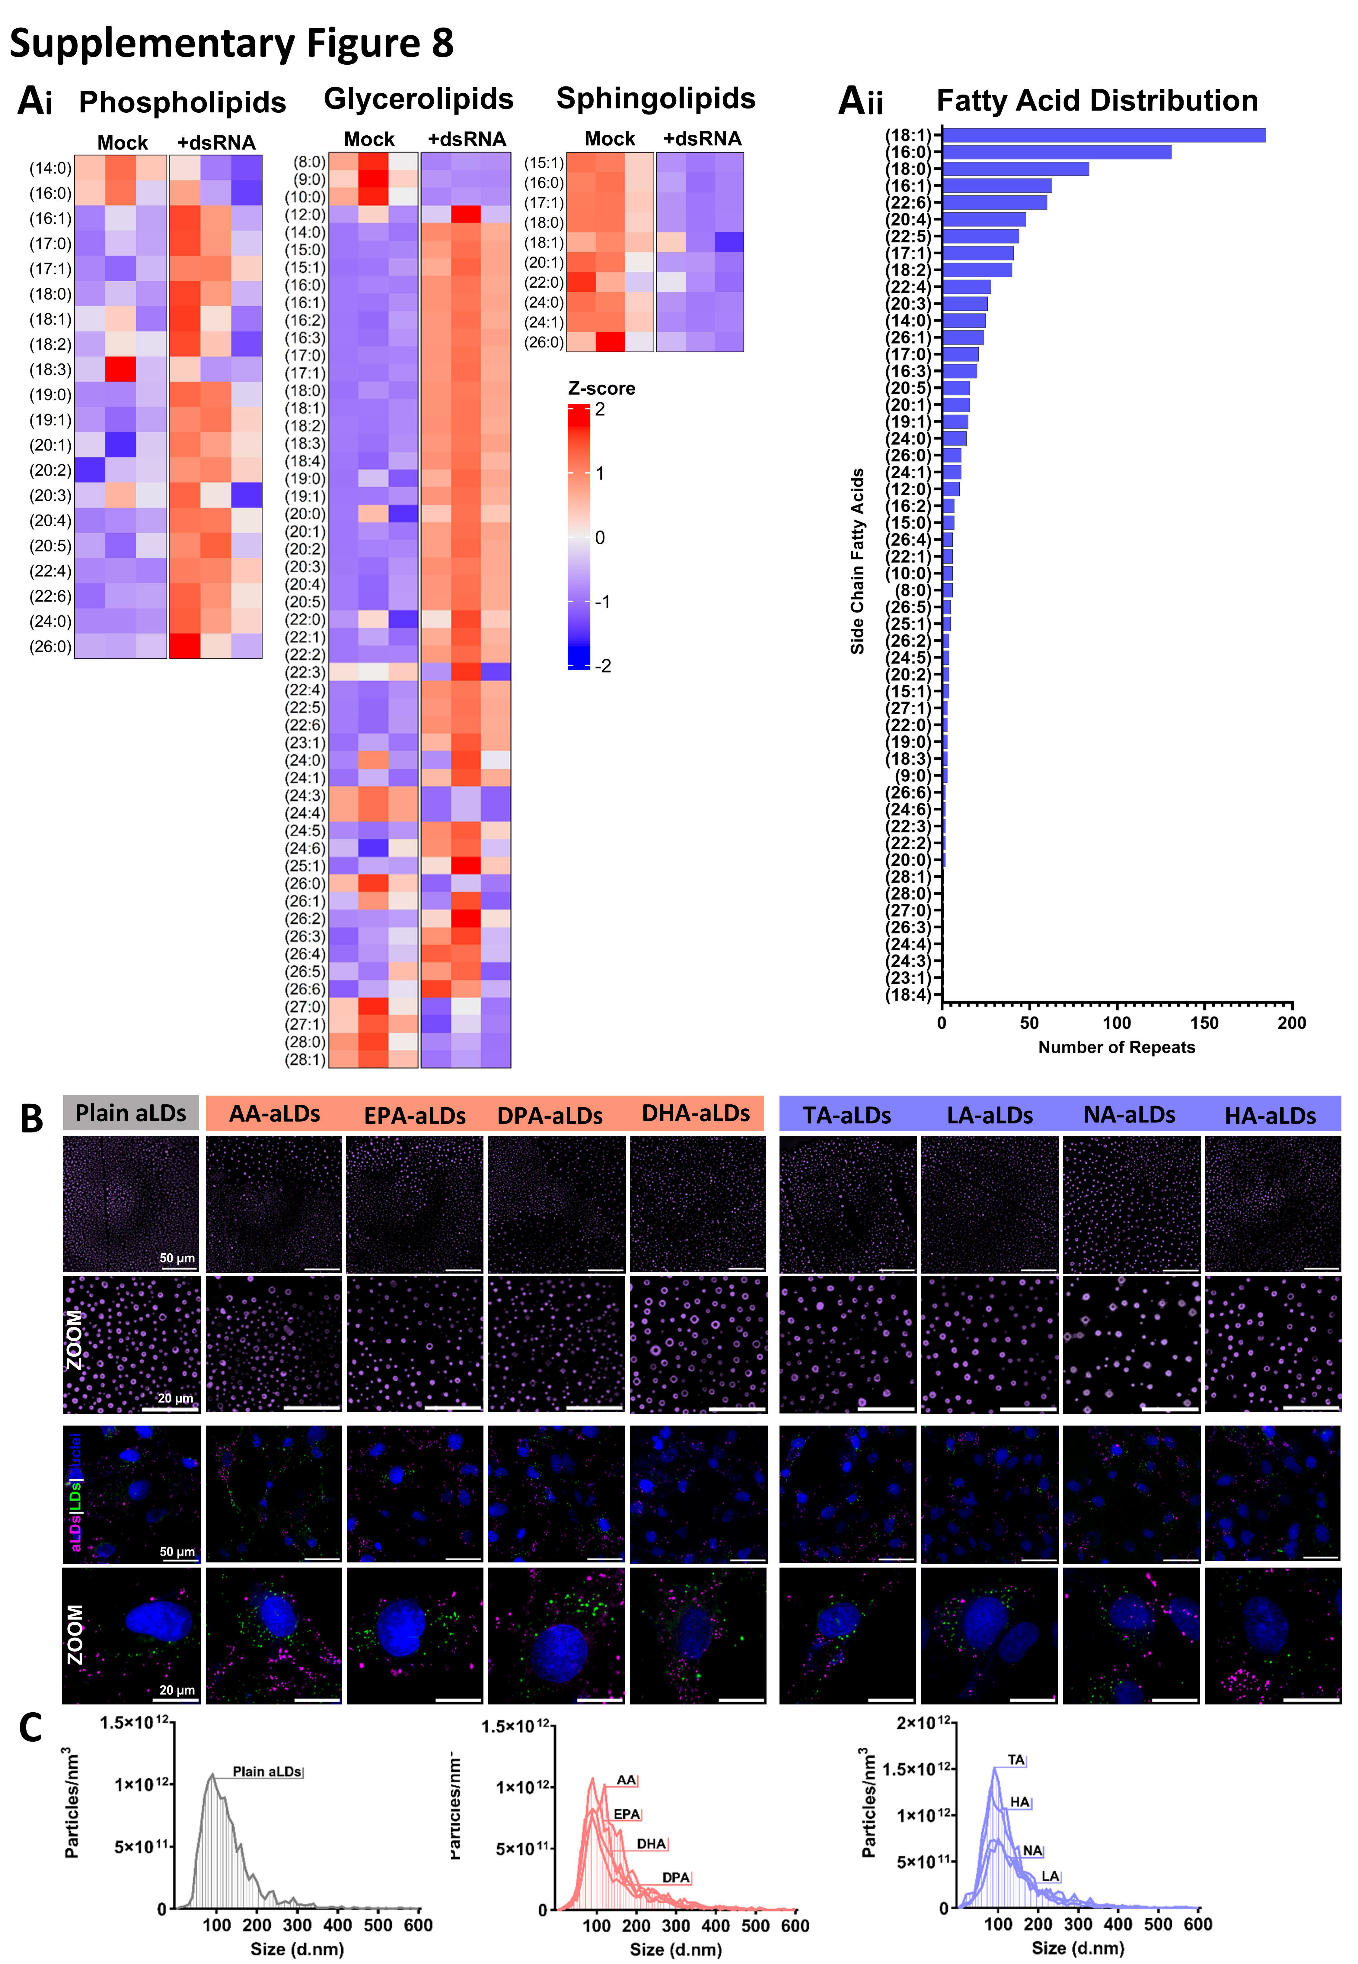


**Figure S8: Long- and very-long PUFAs are upregulated in lipid droplets following dsRNA stimulation.** (**A i)** Comparison of relative intensities of fatty acids in major lipid classes identified in LD fractions isolated from dsRNA-stimulated primary immortalised astrocytes, arranged from shortest to longest fatty acid chain lengths.(**A ii)** Distribution of side-chain fatty acids in isolated LDs from dsRNA stimulated primary immortalised astrocytes 24 hpi. Bar plot displaying distribution of fatty acids (number of carbons: number of double bonds, calculated based on presence on fatty acids) in LD fractions. Data is arranged from side chain fatty acids with highest to the lowest repeats. **(B)** ATTO 647N PPE (purple)-labelled aLD constructs were prepared as either plain aLDs (PC+PE+PI+TG) or FA-loaded aLDs (PC+PE+PI+TG+ FA of choice) and imaged using a Nikon T*i*E fluorescence microscope. FAs including Arachidonic Acid (AA), Eicosapentaenoic acid (EPA), Docosapentaenoic acid (DPA), Docosahexaenoic acid (DHA), Tricosanoic acid (TA), Lignoceric acid (LA), Nervonic acid (NA) and Heptacosanoic Acid (HA) were incorporated at 2% of the total lipid composition. Fatty acids with the highest log2 fold changes are shown in red, and those with the lowest in blue. 100,000 aLDs/cells to primary immortalised astrocyte cells for 2 hrs. Cells were fixed and stained with Bodipy 493/503 (green) and DAPI (blue). Images were taken on a Nikon T*i*E fluorescence microscope. Scale bar =50 & 25 µm. **(C)** aLD particle number and size distribution were measured using Nanoparticle Tracking Analysis (NTA; ZetaView).


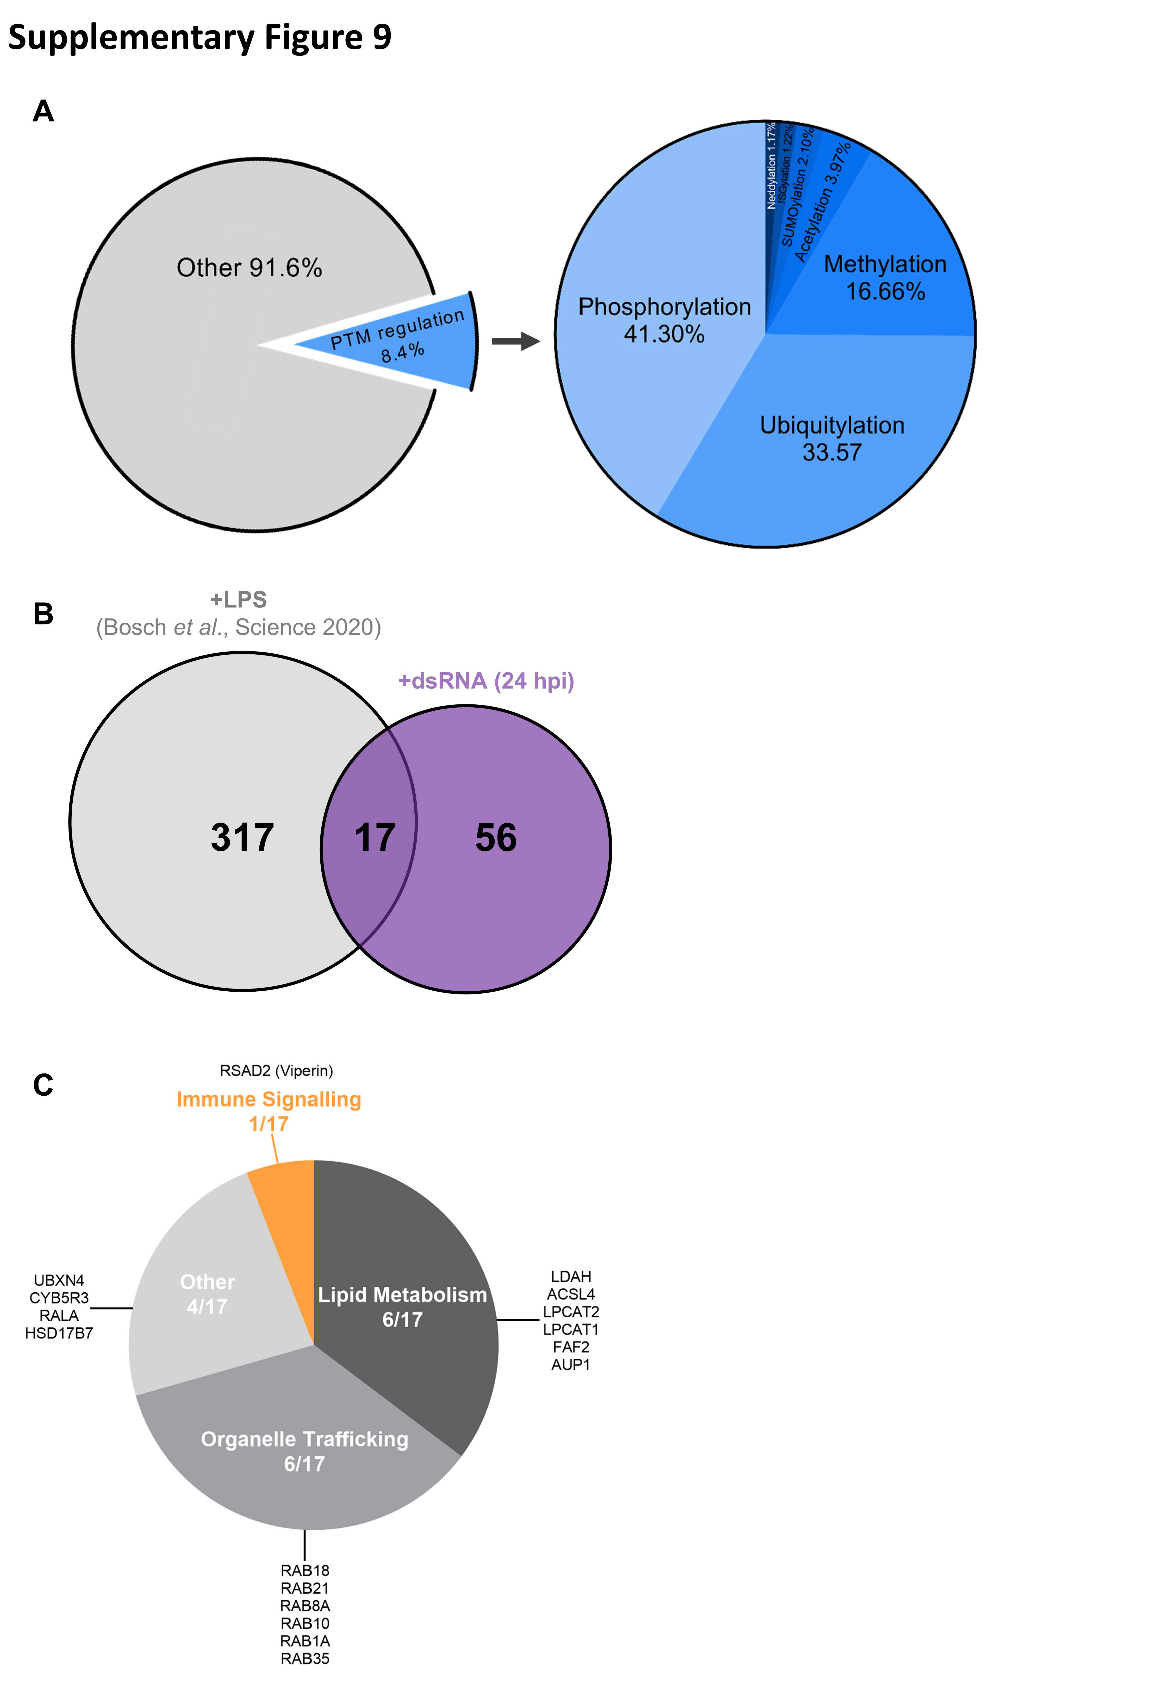


**Figure S9: Virally driven lipid droplets localise a unique proteome with proteins involved in post translational modifications.** (**A)** LPS-induced LD proteome changes from (*29*) Vs our dsRNA- induced LD proteome changes in this data set (24 hrs). **(B)** Of the 17 overlapped proteins, 6 were annotated to be involved in lipid metabolism (LDAH, ACSL4, LPCAT2, LPCAT1, FAF2, AUP1), 6 in organelle trafficking (RAB18, RAB21, RAB8A, RAB10, RAB1A, RAB35), 4 with diverse functions labelled as “other” (UBXN4, CYB5R3, RALA, HSD17B7) and only 1 was involved in immune signalling (RSAD2; viperin). **(C)** Number of identified proteins in our data set with post translational modification (PTM) functions, and a breakdown of those proteins into specific PTC functions.

**Legends to Supplementary Tables**

**Table S1. Proteins identified in LCMV infected brains.**

The table includes proteins identified in brain homogenates of animals infected with LCMV as compared to SHAM animals. Proteins are sorted into: Upregulated, downregulated or present. Proteins are displayed with LogFC scores.

**Table S2. Proteins identified in dsRNA stimulated astrocyte cells.**

The table includes proteins identified in primary immortalized astrocyte cells following stimulation with dsRNA viral mimic for 8 and 24 hrs. Proteins are sorted into: Upregulated, downregulated or present. Proteins are displayed with LogFC scores and gene ontology annotations.

**Table S3. Proteins identified in ZIKV infected astrocyte cells.**

The table includes proteins identified in primary immortalized astrocyte cells following infection with zika virus (ZIKV) MOI 1 for 8 and 24 hrs. Proteins are sorted into: Upregulated, downregulated or present. Proteins are displayed with LogFC scores.

**Table S4. All lipids identified in astrocyte cells.**

The table includes lipids identified in primary immortalized astrocyte cells following stimulation with dsRNA viral mimic for 8 and 24 hrs. Lipids are sorted into lipid droplet and whole cell lysates and are categorized into the respective classes PC: Phosphatidylcholines, PE: Phosphatidylethanolamine, PI: Phosphatidylinositol, LPC: Lysophosphatidylcholine, LPE: Lysophosphatidylethanolamine, TG: riglyceride, SM: Sphingomyelin, Cer: Ceramide, CE: Cholesteryl ester.

**Legends to Supplementary Movies**

**Movie S1. Lipid droplet and mitochondria tracking in mock conditions.**

Primary immortalised astrocytes were mock infected for 8 hrs and then stained live with Bodipy (493/503) to visualise LDs, and MitoTracker Red to stain mitochondria prior to live imaging in cells. A total of 120 FoV images were captured at 500 ms exposure rates every 5 s (10 min in total) on a Zeiss800 confocal. Image stacks were aligned using linear stack alignment with SIFT plugin. Mitochondria channels were binarised in ImageJ, and the LD/Mito image stack was imported into Imaris image software. LDs were tracked using the “spots” function on Imaris and were coloured based on their intensity interactions with the mitochondria (red= interacting, purple= not interacting). n= 100 cells across 6 fields of view over 3 biological replicates.

**Movie S2. Lipid droplet and mitochondria tracking following dsRNA stimulation.**

Primary immortalised astrocytes were stimulated with dsRNA viral mimic for 8 hrs and then stained live with Bodipy (493/503) to visualise LDs, and MitoTracker Red to stain mitochondria prior to live imaging in cells. A total of 120 FoV images were captured at 500 ms exposure rates every 5 s (10 min in total) on a Zeiss800 confocal. Image stacks were aligned using linear stack alignment with SIFT plugin. Mitochondria channels were binarised in ImageJ, and the LD/Mito image stack was imported into Imaris image software. LDs were tracked using the “spots” function on Imaris and were coloured based on their intensity interactions with the mitochondria (red= interacting, purple= not interacting). n= 100 cells across 6 fields of view over 3 biological replicates.

**Movie S3. Lipid droplet and mitochondria tracking following ZIKV infection.**

Primary immortalised astrocytes were infected with ZIKV (MOI 1) for 8 hrs and then stained live with Bodipy (493/503) to visualise LDs, and MitoTracker Red to stain mitochondria prior to live imaging in cells. A total of 120 FoV images were captured at 500 ms exposure rates every 5 s (10 min in total) on a Zeiss800 confocal. Image stacks were aligned using linear stack alignment with SIFT plugin. Mitochondria channels were binarised in ImageJ, and the LD/Mito image stack was imported into Imaris image software. LDs were tracked using the “spots” function on Imaris and were coloured based on their intensity interactions with the mitochondria (red= interacting, purple= not interacting). n= 100 cells across 6 fields of view over 3 biological replicates.

**Movie S4. Lipid droplet and mitochondria tracking following oleic acid treatment.**

Primary immortalised astrocytes were treated with oleic acid (OA, 500 µM) for 8 hrs and then stained live with Bodipy (493/503) to visualise LDs, and MitoTracker Red to stain mitochondria prior to live imaging in cells. A total of 120 FoV images were captured at 500 ms exposure rates every 5 s (10 min in total) on a Zeiss800 confocal. Image stacks were aligned using linear stack alignment with SIFT plugin. Mitochondria channels were binarised in ImageJ, and the LD/Mito image stack was imported into Imaris image software. LDs were tracked using the “spots” function on Imaris and were coloured based on their intensity interactions with the mitochondria (red= interacting, purple= not interacting). n= 100 cells across 6 fields of view over 3 biological replicates.
